# Supplementary material
Source: publisher figshare collection journal article supplement (https://tandf.figshare.com/ndownloader/files/30927427)
Supplement: Supplementary file 1 [file 30927427]

## A Asymptotic Variance-Covariance Matrix of Mistreated Distributions

The matrices  $A$  and  $B$  in Section 3.1 have the following forms:

$$\mathbf{A} = n \sum_{j=1}^m \pi_j \begin{pmatrix} a_{\gamma_0 \gamma_0} & x_j a_{\gamma_0 \gamma_0} & a_{\gamma_0 \sigma} \\ x_j a_{\gamma_0 \gamma_0} & x_j^2 a_{\gamma_0 \gamma_0} & x_j a_{\gamma_0 \sigma} \\ a_{\gamma_0 \sigma} & x_j a_{\gamma_0 \sigma} & a_{\sigma \sigma} \end{pmatrix},$$

$$\mathbf{B} = n \sum_{j=1}^m \pi_j \begin{pmatrix} b_{\gamma_0 \gamma_0} & x_j b_{\gamma_0 \gamma_0} & a_{\gamma_0 \sigma} \\ x_j b_{\gamma_0 \gamma_0} & x_j^2 b_{\gamma_0 \gamma_0} & x_j b_{\gamma_0 \sigma} \\ b_{\gamma_0 \sigma} & x_j b_{\gamma_0 \sigma} & b_{\sigma \sigma} \end{pmatrix}.$$

Following the notations in Section 3.3, the elements of matrices  $A$  and  $B$  for the cases of complete and censored data are derived in as follows.

### A.1 The Case of Complete Data

#### A.1.1 $M_{LG}$ is true distribution, but wrongly treated as $M_{SEV}$

$$a_{\gamma_0 e \gamma_0 e} = \frac{1}{\sigma_e^2} \sum_{i=1}^n E_{LG}(-e^{Z_{ije}})$$

$$a_{\gamma_0 e \sigma_e} = \frac{1}{\sigma_e^2} \sum_{i=1}^n E_{LG} \left( \frac{-Z_{ije} e^{Z_{ije}}}{\sigma_e} - e^{Z_{ije}} + 1 \right)$$

$$a_{\sigma_e \sigma_e} = \frac{1}{\sigma_e^2} \sum_{i=1}^n E_{LG} \left( \frac{-Z_{ije}^2 e^{Z_{ije}}}{\sigma_e} - 2Z_{ije} e^{Z_{ije}} + 2Z_{ije} + 1 \right)$$

$$b_{\gamma_0 e \gamma_0 e} = \frac{1}{\sigma_e^2} \sum_{i=1}^n E_{LG} (e^{Z_{ije}} - 1)^2$$

$$b_{\gamma_0 e \sigma_e} = \frac{1}{\sigma_e^2} \sum_{i=1}^n E_{LG} (Z_{ije} e^{Z_{ije}} - Z_{ije} - 1) (e^{Z_{ije}} - 1)$$

$$b_{\sigma_e \sigma_e} = \frac{1}{\sigma_e^2} \sum_{i=1}^n E_{LG} (Z_{ije} e^{Z_{ije}} - Z_{ije} - 1)$$

### A.1.2 $M_{LG}$ is true distribution, but wrongly treated as $M_{Nor}$

$$\begin{aligned}
a_{\gamma_{0N}\gamma_{0N}} &= -\frac{1}{\sigma_N^2} \\
a_{\gamma_{0N}\sigma_N} &= \frac{1}{\sigma_N^2} \sum_{i=1}^n -\frac{2}{\sigma_N} E_{LG}(\log t_{ij} - \mu_N(x_j)) \\
a_{\sigma_N\sigma_N} &= \frac{1}{\sigma_N^2} \left( 1 - \sum_{i=1}^n \frac{3}{\sigma_N^2} E_{LG}(\log t_{ij} - \mu_N(x_j))^2 \right) \\
b_{\gamma_{0N}\gamma_{0N}} &= \frac{1}{\sigma_N^2} \sum_{i=1}^n E_{LG}(Z_{iN})^2 \\
b_{\gamma_{0N}\sigma_N} &= \frac{1}{\sigma_N^2} \sum_{i=1}^n E_{LG}(Z_{iN}(Z_{iN}^2 - 1)) \\
b_{\sigma_N\sigma_N} &= \frac{1}{\sigma_N^2} \sum_{i=1}^n E_{LG}(Z_{iN}^2 - 1)^2
\end{aligned}$$

## A.2 The Case of Censored Data

### A.2.1 $M_{LG}$ is true distribution, but wrongly treated as $M_{SEV}$

$$\begin{aligned}
a_{\gamma_{0e}\gamma_{0e}} &= \frac{1}{\sigma_e^2} \left\{ -e^{\zeta_{je}} (1 - \Phi_{LG}(\zeta_{jg})) - \int_{-\infty}^{\eta_j} e^{Z_{ije}} \phi_{LG}(Z_{ijg}) dt_{ij} \right\} \\
a_{\gamma_{0e}\sigma_e} &= \frac{1}{\sigma_e^2} \left\{ a_{\gamma_{0e}\gamma_{0e}} - \zeta_{je} e^{\zeta_{je}} (1 - \Phi_{LG}(\zeta_{jg})) + \Phi_{LG}(\zeta_{jg}) - \int_{-\infty}^{\eta_j} Z_{ije} e^{Z_{ije}} \phi_{LG}(Z_{ijg}) dt_{ij} \right\} \\
a_{\sigma_e\sigma_e} &= \frac{1}{\sigma_e^2} \left\{ \zeta_{je} e^{\zeta_{je}} (1 - \Phi_{LG}(\zeta_{jg})) (2 - \zeta_{je}) - 3\Phi_{LG}(\zeta_{jg}) - \right. \\
&\quad \left. \int_{-\infty}^{\eta_j} Z_{ije} [Z_{ije} e^{Z_{ije}} - 2 + 2e^{Z_{ije}}] \phi_{LG}(Z_{ijg}) dt_{ij} \right\} \\
b_{\gamma_{0e}\gamma_{0e}} &= \frac{1}{\sigma_e^2} \left\{ e^{2\zeta_{je}} (1 - \Phi_{LG}(\zeta_{jg})) + \int_{-\infty}^{\eta_j} (e^{Z_{ije}} - 1)^2 \phi_{LG}(Z_{ijg}) dt_{ij} \right\} \\
b_{\gamma_{0e}\sigma_e} &= \frac{1}{\sigma_e^2} \left\{ \zeta_{je} e^{2\zeta_{je}} (1 - \Phi_{LG}(\zeta_{jg})) + \Phi_{LG}(\zeta_{jg}) + \int_{-\infty}^{\eta_j} [Z_{ije} (e^{Z_{ije}} - 1)^2 - e^{Z_{ije}}] \phi_{LG}(Z_{ijg}) dt_{ij} \right\} \\
b_{\sigma_e\sigma_e} &= \frac{1}{\sigma_e^2} \left\{ (\zeta_{je} e^{\zeta_{je}})^2 (1 - \Phi_{LG}(\zeta_{jg})) + \int_{-\infty}^{\eta_j} [Z_{ije} e^{Z_{ije}} - 1 - Z_{ije}]^2 \phi_{LG}(Z_{ijg}) dt_{ij} \right\}
\end{aligned}$$

### A.2.2 $M_{LG}$ is true distribution, but wrongly treated as $M_{Nor}$

$$\begin{aligned}
a_{\gamma_{0N}\gamma_{0N}} &= \frac{1}{\sigma_N^2} \left\{ (1 - \Phi_{LG}(\zeta_{jg})) \left( \frac{\zeta_{jN}\phi_{Nor}(\zeta_{jN})}{1 - \Phi_{Nor}(\zeta_{jN})} - \left( \frac{\phi_{Nor}(\zeta_{jN})}{1 - \Phi_{Nor}(\zeta_{jN})} \right)^2 \right) - \Phi_{LG}(\zeta_{jg}) \right\} \\
a_{\gamma_{0N}\sigma_N} &= \frac{1}{\sigma_N^2} \left\{ \frac{\phi_{Nor}(\zeta_{jN})(1 - \Phi_{LG}(\zeta_{jg}))}{1 - \Phi_{Nor}(\zeta_{jN})} \left( -\frac{\zeta_{jN}\phi_{Nor}(\zeta_{jN})}{1 - \Phi_{Nor}(\zeta_{jN})} + \zeta_{jN}^2 - 1 \right) - \right. \\
&\quad \left. 2 \int_{-\infty}^{\eta_j} Z_{ijN} \phi_{LG}(Z_{ijg}) dt_{ij} \right\} \\
a_{\sigma_N\sigma_N} &= \frac{1}{\sigma_N^2} \left\{ \frac{\zeta_{jN}\phi_{Nor}(\zeta_{jN})(1 - \Phi_{LG}(\zeta_{jg}))}{1 - \Phi_{Nor}(\zeta_{jN})} \left( -\frac{\zeta_{jN}\phi_{Nor}(\zeta_{jN})}{1 - \Phi_{Nor}(\zeta_{jN})} + \zeta_{jN}^2 - 2 \right) + \Phi_{LG}(\zeta_{jg}) - \right. \\
&\quad \left. 3 \int_{-\infty}^{\eta_j} Z_{ijN}^2 \phi_{LG}(Z_{ijg}) dt_{ij} \right\} \\
b_{\gamma_{0N}\gamma_{0N}} &= \frac{1}{\sigma_N^2} \left\{ (1 - \Phi_{LG}(\zeta_{jg})) \left( \frac{\phi_{Nor}(\zeta_{jN})}{1 - \Phi_{Nor}(\zeta_{jN})} \right)^2 + \int_{-\infty}^{\eta_j} Z_{ijN}^2 \phi_{LG}(Z_{ijg}) dt_{ij} \right\} \\
b_{\gamma_{0N}\sigma_N} &= \frac{1}{\sigma_N^2} \left\{ \zeta_{jN} (1 - \Phi_{LG}(\zeta_{jg})) \left( \frac{\phi_{Nor}(\zeta_{jN})}{1 - \Phi_{Nor}(\zeta_{jN})} \right)^2 + \int_{-\infty}^{\eta_j} Z_{ijN} (Z_{ijN}^2 - 1) \phi_{LG}(Z_{ijg}) dt_{ij} \right\} \\
b_{\sigma_N\sigma_N} &= \frac{1}{\sigma_N^2} \left\{ (1 - \Phi_{LG}(\zeta_{jg})) \left( \frac{\zeta_{jN}\phi_{Nor}(\zeta_{jN})}{1 - \Phi_{Nor}(\zeta_{jN})} \right)^2 + \int_{-\infty}^{\eta_j} (Z_{ijN}^2 - 1)^2 \phi_{LG}(Z_{ijg}) dt_{ij} \right\}
\end{aligned}$$

## B The Derivation of $P_2$ and $P_3$ in Table 2

### B.1 The Case of Censored data

To prove  $P_3$  in Table 2 following results based on the definition of  $\delta_i$  for the model  $M_k$  in (31) are required:

$$\begin{aligned}
E_k(\delta_i) &= \Phi_k(\zeta_j) \\
E_k(\delta_i) &= E_k(\delta_i^2), \\
E_k(g(\log t_{ij})\delta_i) &= \int_{-\infty}^{\log \eta_j} g(\log t_{ij}) \phi_k(\log t_{ij}) dt_{ij}, \\
E_k(g(\log t_{ij})\delta_i^2) &= E_k(g(\log t_{ij})\delta_i).
\end{aligned}$$

### B.1.1 $M_{LG}$ is true distribution, but wrongly treated as $M_{SEV}$

Consider  $P_1$  in Table 2, when the wrong model is Weibull the expectation of the  $(-\mathfrak{S}_{SEV})$  under the  $GG_3$  distribution is given by:

$$E(-\mathfrak{S}_{SEV}) = n \sum_{j=1}^m \pi_j \left\{ E_{LG}(\delta_i \log \sigma_e) - E_{LG}(\delta_i Z_{ije}) + E_{LG}(\delta_i e^{Z_{ije}}) \right. \\ \left. + E_{LG}(e^{\zeta_{ije}}) - E_{LG}(\delta_i e^{\zeta_{ije}}) \right\} \quad (1)$$

### B.1.2 $M_{LG}$ is true distribution, but wrongly treated as $M_{Nor}$

Consider  $P_1$  in Table 2, when the wrong model is Lognormal the expectation of the  $(-\mathfrak{S}_{Nor})$  under the  $GG_3$  distribution is given by:

$$E(-\mathfrak{S}_{Nor}) = n \sum_{j=1}^m \pi_j \left\{ E_{LG}(\delta_i \log \sigma_N) - E_{LG}\left(\delta_i \frac{\log 2\pi}{2}\right) + E_{LG}\left(\delta_i \frac{Z_{ijN}^2}{2}\right) - \right. \\ \left. \log(1 - \Phi_{Nor}(\zeta_{ijN})) + E_{LG}(\delta_i \log(1 - \phi_{Nor}(\zeta_{ijN}))) \right\} \quad (2)$$

## B.2 The Case of Complete Data

To prove  $P_2$  in Table 2 the results in Section B.1 and following results are required:

$$E_{LG}(\log t_{ij}) = \mu_g(x_j) + \sigma_g \varphi(k), \\ E_{LG}(e^{a \log t_{ij}}) = \frac{e^{a \mu_g(x_j)} \Gamma(a \sigma_g + k)}{\Gamma(k)}, \\ E_{LG}(\log t_{ij}^2) = [\mu_g(x_j) + \sigma_g \varphi(k)]^2 + \sigma_g^2 \varphi'(k).$$

### B.2.1 $M_{LG}$ is true distribution, but wrongly treated as $M_{SEV}$

Consider  $\eta \rightarrow \infty$ , Equation (1) can be simplified as:

$$E(-\mathfrak{S}_{SEV}) = n \sum_{j=1}^m \pi_j \left\{ \log \sigma_e - E_{LG}(Z_{ije}) + E_{LG}(e^{Z_{ije}}) \right\} \quad (3)$$

### B.2.2 $M_{LG}$ is true distribution, but wrongly treated as $M_{Nor}$

Consider  $\eta \rightarrow \infty$ , Equation (2) can be simplified as:

$$E(-\mathfrak{I}_{Nor}) = n \sum_{j=1}^m \pi_j \left\{ \log \sigma_N - \frac{\log 2\pi}{2} + E_{LG} \left( \frac{Z_{ijN}^2}{2} \right) \right\} \quad (4)$$

## C The Pairwise Plots of $RB$ and $RV$ for Weibull and Log-normal for Complete Data

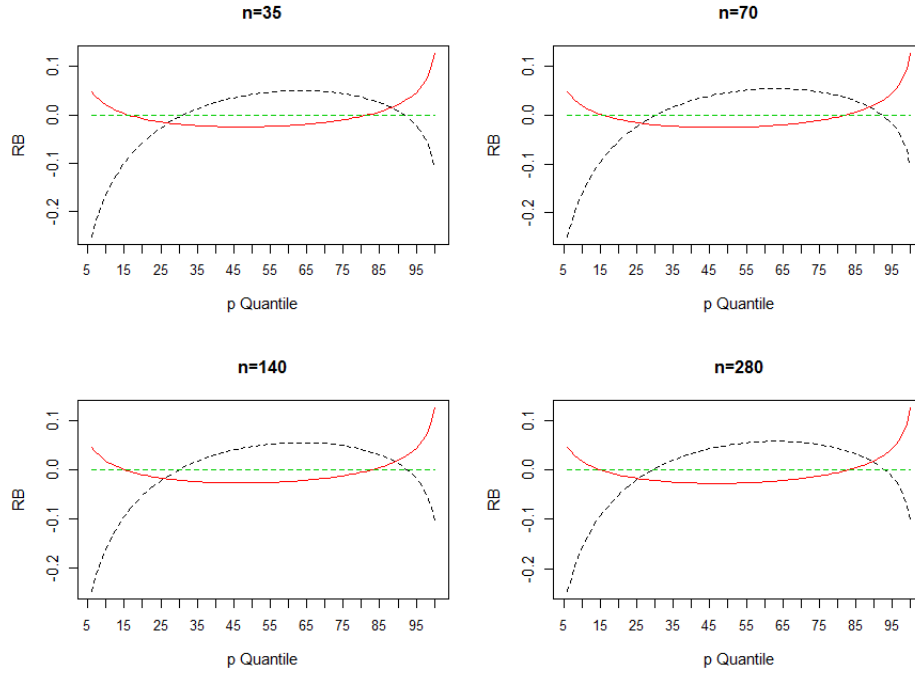

Figure 1: Comparison of  $RB$  between Lognormal (black/dash) and Weibull (red/solid) base on the total sample size.

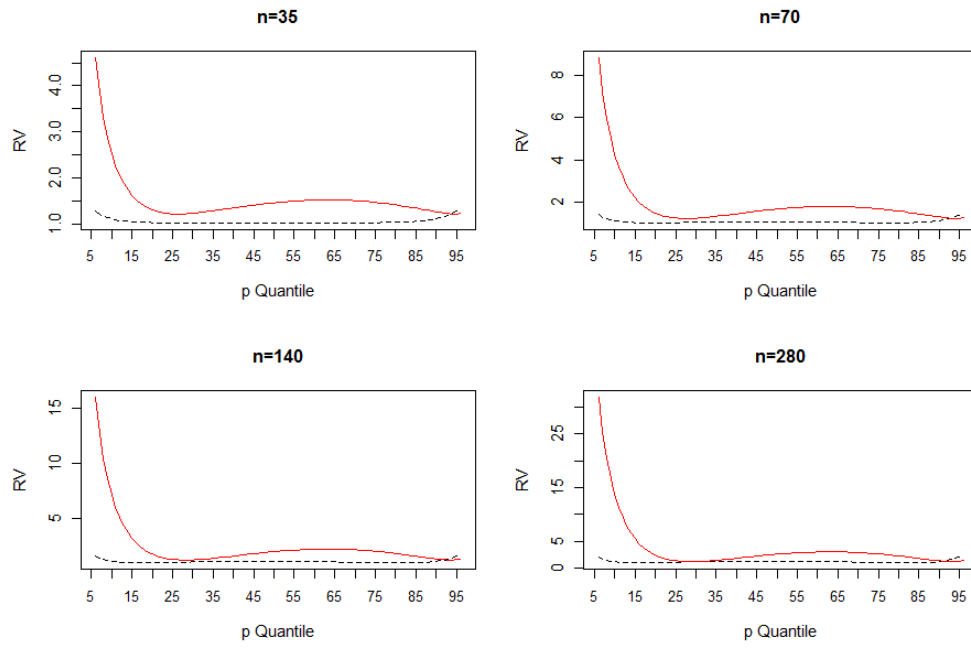

Figure 2: Comparison of  $RV$  between Lognormal (black/dash) and Weibull (red/solid) base on the total sample size.
